# Supplementary material for: Thermoresponsive behaviour of poly[(oligo(ethyleneglycol methacrylate)]s and their protein conjugates: importance of concentration and solvent system
Source: Royal Society of Chemistry journal article supplement (doi:10.1039/c0py00408a), 2011-01-01
Supplement: c0py00408a.pdf [file c0py00408a.pdf]

Electronic Supporting Information for:

"Thermoresponsive Behaviour of Poly  
[(oligo(ethylene glycol methacrylate)s] and their Protein Conjugates. Importance of  
Concentration and Solvent System."

Konstaninos Bebis, Mathew W. Jones, David M. Haddleton and Matthew I. Gibson\*

Department of Chemistry

University of Warwick

Coventry, CV4 7AL, UK

\*Corresponding author

Phone: +44 247 652 4803

Fax: +44 247 652 4112

[m.i.gibson@warwick.ac.uk](mailto:m.i.gibson@warwick.ac.uk)

### Example turbidimetry curves showing influence of concentration on LCST

Obtaining curves at low (sub 1 mg.mL<sup>-1</sup>) gave lower absorbance values resulting in less well defined curves, but there was still a clear shift upon dilution. This shift was confirmed by complimentary DLS and DSC analysis as dicussed in the main text.

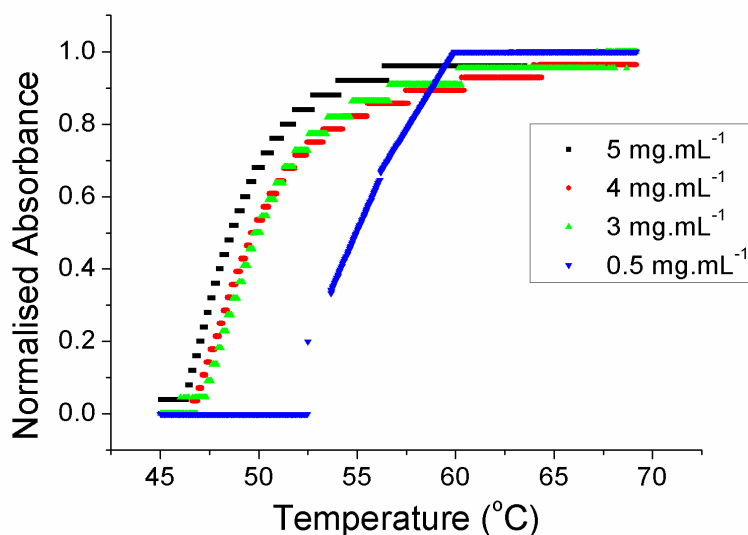

Figure S1. Turbidimetry curves of P3 at various concentrations.

### Evaluation of NaCl concentration on observed LCST.

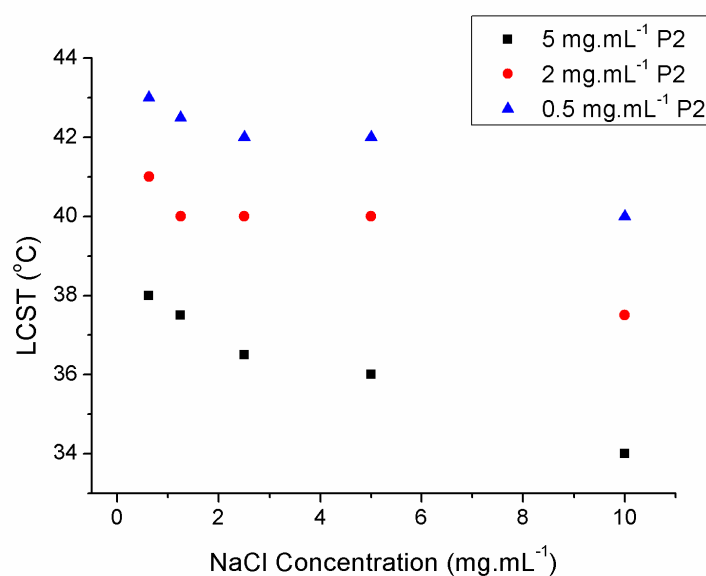

Figure S2. LCST of P2 as a function of [NaCl]

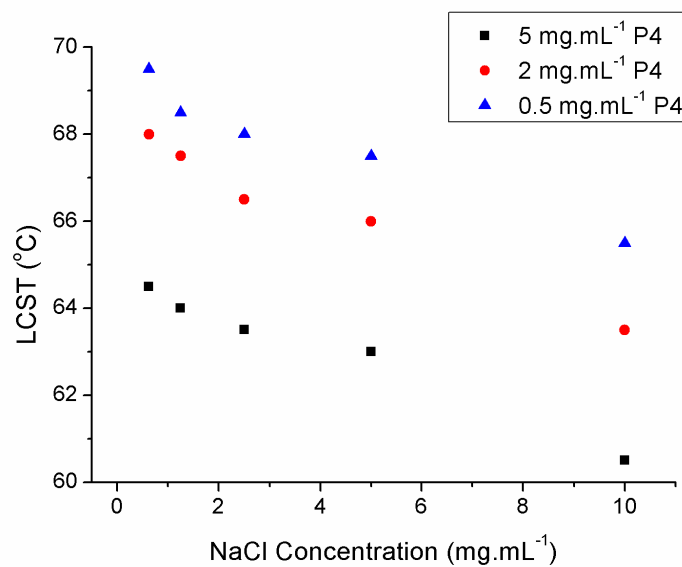

**Figure S3.** LCST of P4 as a function of [NaCl]

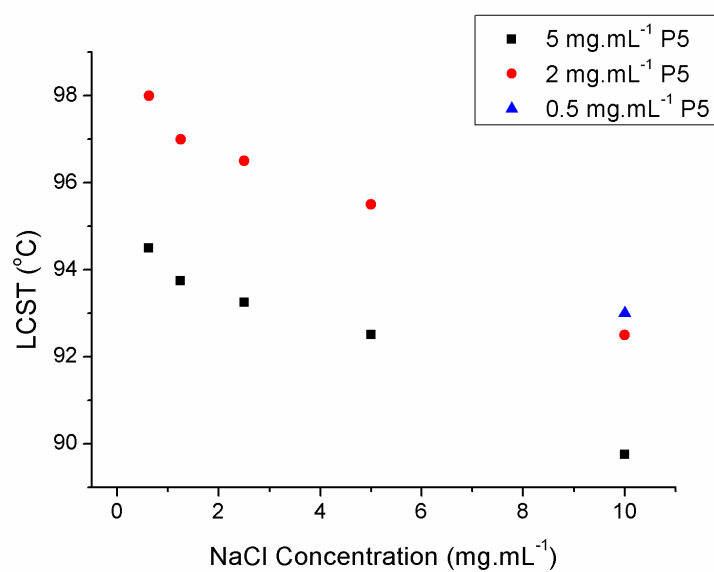

**Figure S4.** LCST of P5 as a function of [NaCl]

## Onset Temperatures as a function of NaCl Concentration

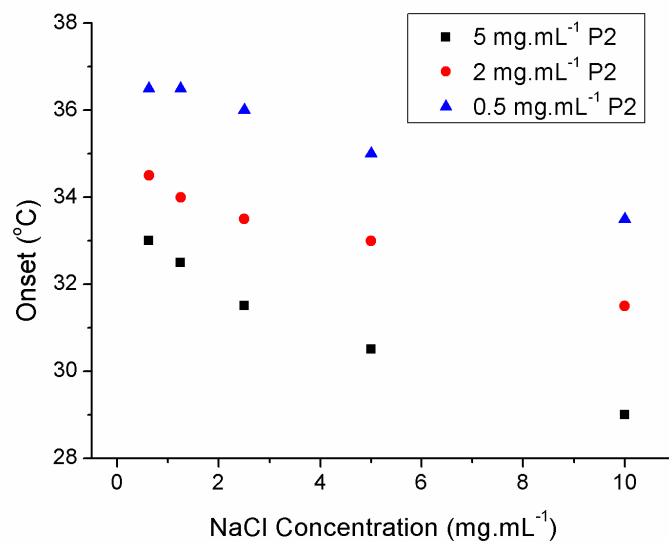

**Figure S5.** LCST onset of P2 as a function of [NaCl]

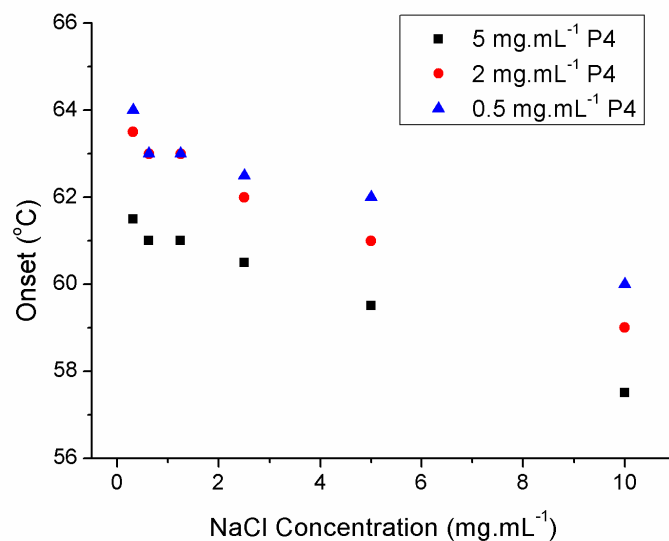

**Figure S6.** LCST of P4 as a function of [NaCl]

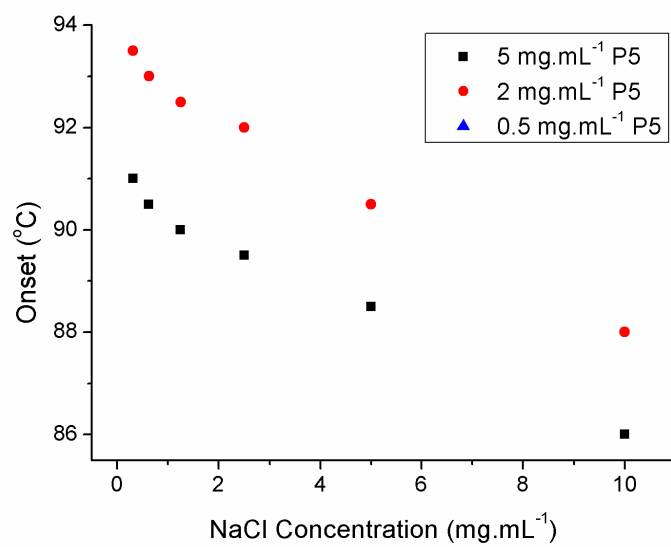

**Figure S7.** LCST onset of P5 as a function of [NaCl]
